# Supplementary material for: Neutrophil extracellular traps in the central nervous system hinder bacterial clearance during pneumococcal meningitis
Source: PubMed Central journal article supplement (PMC6458182; doi:10.1038/s41467-019-09040-0), 2019-04-10
Supplement: 41467_2019_9040_MOESM2_ESM.pdf [file 41467_2019_9040_MOESM2_ESM.pdf]

## **Description of Additional Supplementary Files**

File Name: Supplementary Data 1

Description: 1215 proteins were identified after LC-MS/MS analysis at 1 % FDR when searching the searching against the TIGR4 library (Swiss-Uniprot ID - UP000000585) . The table shows protein identification, uniprot accession number and spectral counts derived from pneumococcal strains. The spectral count data is presented in a raw non-normalized format.
